# Supplementary material
Source: PubMed Central journal article supplement (PMC3179809)
Supplement: NIHMS299726-supplement-01.pdf [file NIHMS299726-supplement-01.pdf]

**Supplemental Table 1. SNPs evaluated and allele frequency**

| Gene        | Chromosome | SNP           | Function      | RS#      | Minor Allele Frequency <sup>1</sup> |          |
|-------------|------------|---------------|---------------|----------|-------------------------------------|----------|
|             |            |               |               |          | Reported                            | Observed |
| <b>EXO1</b> | 1q42-q43   | Ex2+1G>A      | 5'UTR         | 1635517  | 0.433                               | 0.473    |
|             |            | Ex2+117C>T    | 5'UTR         | 1776177  | 0.46                                | 0.46     |
|             |            | Ex9+80A>G     | N279S         | 4149909  | 0.058                               | 0.046    |
|             |            | Ex11+20G>A    | R354H         | 735943   | 0.433                               | 0.424    |
|             |            | Ex12+49C>T    | T439M         | 4149963  | 0.103                               | 0.096    |
|             |            | Ex12+105G>A   | V458M         | 4149965  | 0.242                               | 0.24     |
|             |            | Ex13+251G>A   | E589K         | 1047840  | 0.39                                | 0.371    |
|             |            | Ex13-101A>G   | E670G         | 1776148  | 0.32                                | 0.326    |
|             |            | Ex15+59C>T    | P757L         | 9350     | 0.183                               | 0.182    |
|             |            | Ex16-7A>G     | 3'UTR         | 851797   | 0.394                               | 0.275    |
| <b>MGMT</b> | 10q26      | IVS10-2632G>T | Intron        | 1635510  | 0.49                                | 0.482    |
|             |            | Ex1-16C>T     | 5'UTR         | 16906252 | 0.12                                | 0.07     |
|             |            | Ex5+34C>T     | L53L          | 1803965  | 0.129                               | 0.115    |
|             |            | Ex5-25C>T     | L84F          | 12917    | 0.125                               | 0.138    |
|             |            | Ex7+13A>G     | I143V         | 2308321  | 0.10                                | 0.12     |
|             |            | Ex7+119A>G    | K178R         | 2308327  | 0.129                               | 0.145    |
|             |            | IVS4-75473G>A | Intron        | 524804   | 0.43                                | 0.46     |
|             |            | IVS4-44836G>A | Intron        | 9971190  | 0.48                                | 0.411    |
|             |            | IVS4-7901C>T  | Intron        | 7069143  | 0.45                                | 0.466    |
|             |            | IVS5+23129G>A | Intron        | 7898151  | 0.40                                | 0.457    |
| <b>MLH1</b> | 3p21.3     | Ex8-41G>A     | V213M         | 2308317  | 0.01                                | 0.002    |
|             |            | Ex8-23A>G     | I219V         | 1799977  | 0.058                               | 0.052    |
|             |            | -93G>A        | promoter      | 1800734  | 0.17                                | 0.277    |
|             |            | IVS3-659A>C   | Intron        | 3774341  | 0.46                                | 0.45     |
|             |            | IVS12-169C>T  | Intron        | 2286940  | 0.414                               | 0.449    |
|             |            | IVS14-19A>G   | Intron        | 9876116  | 0.47                                | 0.465    |
|             |            | *919T>C       | 3' near gene  | 1558529  | 0.433                               | 0.448    |
| <b>MLH3</b> | 14q24.3    | Ex2-1060G>T   | V741F         | 28756990 | 0.024                               | 0.021    |
|             |            | Ex2-750C>T    | P844L         | 175080   | 0.431                               | 0.474    |
|             |            | Ex3+35C>A     | D1105E        | 28757008 | 0.024                               | 0.015    |
|             |            | Ex13+93A>G    | Q1421Q        | 13712    | 0.494                               | 0.473    |
|             |            | IVS6+35C>G    | Intron        | 3742780  | 0.474                               | 0.487    |
| <b>MSH2</b> | 2p22-p21   | Ex6+23G>A     | G322D         | 4987188  | 0.032                               | 0.053    |
|             |            | -117T>C       | promoter      | 2303425  | 0.21                                | 0.141    |
|             |            | IVS1+9C>G     | Intron        | 2303426  | 0.438                               | 0.362    |
|             |            | IVS9-9A>T     | splicing site | 12998837 | 0.169                               | 0.112    |
|             |            | IVS11-62G>A   | Intron        | 17218439 | 0.20                                | 0.222    |
|             |            | IVS12-265A>G  | Intron        | 2059520  | 0.31                                | 0.37     |
|             |            | IVS12-6T>C    | splicing site | 2303428  | 0.145                               | 0.142    |
| <b>MSH3</b> | 5q11-q12   | Ex1-3A>G      | I79V          | 1650697  | 0.26                                | 0.215    |
|             |            | Ex4-100G>A    | P231P         | 1805355  | 0.062                               | 0.07     |
|             |            | Ex21+33A>G    | Q949R         | 184967   | 0.20                                | 0.285    |
|             |            | Ex23+3A>G     | T1045A        | 26279    | 0.312                               | 0.31     |
|             |            | Ex24-318G>A   | 3'UTR         | 394592   | 0.133                               | 0.173    |
|             |            | IVS10-3448A>G | Intron        | 40139    | 0.43                                | 0.436    |
|             |            | IVS12+1841T>G | Intron        | 863221   | 0.354                               | 0.374    |
|             |            | IVS23+437G>A  | Intron        | 27494    | 0.312                               | 0.30     |
| <b>MSH6</b> | 2p16       | Ex1-145G>A    | G39E          | 1042821  | 0.207                               | 0.220    |
|             |            | Ex2+16A>G     | P92P          | 1800932  | 0.225                               | 0.189    |
|             |            | Ex3+83T>C     | D180D         | 1800935  | 0.283                               | 0.27     |
|             |            | IVS1+2214C>T  | Intron        | 3136245  | 0.183                               | 0.20     |
|             |            | IVS4-101G>C   | Intron        | 2072447  | 0.237                               | 0.237    |
| <b>PMS1</b> | 2q31-q33   | Ex1-4G>C      | 5'UTR         | 5742933  | 0.22                                | 0.22     |

|              |         |               |              |            |              |          |       |       |
|--------------|---------|---------------|--------------|------------|--------------|----------|-------|-------|
| <b>PMS2</b>  | 7p22.2  | -3905C>T      | promoter     | 2009115    | 0.125        | 0.09     |       |       |
|              |         | -153C>G       | promoter     | 3735296    | 0.10         | 0.136    |       |       |
|              |         | Ex7-24C>G     | S260S        | 6463524    | 0.39         | 0.20     |       |       |
|              |         | Ex11+264C>T   | P470S        | 1805321    | 0.359        | 0.31     |       |       |
|              |         | Ex11+310C>A   | T485K        | 1805323    | 0.054        | 0.07     |       |       |
|              |         | Ex11-386A>G   | K541E        | 2228006    | 0.133        | 0.11     |       |       |
|              |         | Ex11-218A>T   | T597S        | 1805318    | 0.033        | 0.023    |       |       |
|              |         | Ex11-141G>A   | M622I        | 1805324    | 0.017        | 0.023    |       |       |
|              |         | Ex13-23T>C    | F751F        | 1805325    | 0.395        | 0.374    |       |       |
|              |         | Ex14+49A>G    | N775S        | 17420802   | 0.392        | 0.406    |       |       |
|              |         | IVS1-1121C>T  | Intron       | 7797466    | 0.202        | 0.329    |       |       |
|              |         | IVS7-164T>G   | Intron       | 2286681    | 0.41         | 0.391    |       |       |
|              |         | IVS7+442G>T   | Intron       | 12112229   | 0.348        | 0.256    |       |       |
|              |         | <b>PMS2L3</b> | 7q11.23      | Ex1+118C>T | 5'UTR        | 10266080 | 0.02  | 0.014 |
| Ex7-32G>A    | 3'UTR   |               |              | 17147225   | 0.19         | 0.015    |       |       |
| IVS1-8C>T    | Intron  |               |              | 1167823    | 0.208        | 0.06     |       |       |
| IVS2-1578A>G | Intron  |               |              | 1167819    | 0.39         | 0.32     |       |       |
| IVS3+9A>G    | Intron  |               |              | 794378     | 0.28         | 0.34     |       |       |
| <b>RECQL</b> | 12p12   | Ex1+61A>C     | 5'UTR        | 1061626    | 0.136        | 0.16     |       |       |
|              |         | Ex1+123C>T    | 5'UTR        | 1061627    | 0.23         | 0.225    |       |       |
|              |         | Ex14+64T>C    | N577N        | 6500       | 0.05         | 0.09     |       |       |
|              |         | Ex15+159A>C   | 3'UTR        | 13035      | 0.427        | 0.427    |       |       |
|              |         | -5349A>G      | promoter     | 4762834    | 0.27         | 0.281    |       |       |
|              |         | IVS1-570T>G   | Intron       | 2300211    | 0.383        | 0.435    |       |       |
|              |         | IVS1-92C>T    | Intron       | 12423412   | 0.183        | 0.23     |       |       |
|              |         | IVS2-172C>T   | Intron       | 4762703    | 0.10         | 0.09     |       |       |
|              |         | IVS2+703T>C   | Intron       | 6487235    | 0.25         | 0.30     |       |       |
|              |         | IVS2+1222T>C  | Intron       | 2284394    | 0.25         | 0.299    |       |       |
|              |         | IVS4-795C>T   | Intron       | 11612017   | 0.46         | 0.40     |       |       |
|              |         | IVS4+1179T>C  | Intron       | 10743416   | 0.345        | 0.403    |       |       |
|              |         | IVS5-717C>A   | Intron       | 10841833   | 0.208        | 0.242    |       |       |
|              |         | IVS6-1031T>C  | Intron       | 2284392    | 0.367        | 0.42     |       |       |
|              |         | IVS6+1916T>G  | Intron       | 7307064    | 0.117        | 0.188    |       |       |
|              |         | IVS8+190A>G   | Intron       | 2159944    | 0.208        | 0.303    |       |       |
|              |         | IVS8+532A>G   | Intron       | 1029931    | 0.24         | 0.269    |       |       |
|              |         | IVS11+218T>G  | Intron       | 997820     | 0.475        | 0.402    |       |       |
|              |         | IVS11+582T>A  | Intron       | 10161130   | 0.466        | 0.49     |       |       |
|              |         | IVS12-916T>C  | Intron       | 10841830   | 0.058        | 0.08     |       |       |
|              |         | <b>TP73</b>   | 1p36.3       | *1236A>G   | 3' near gene | 7319     | 0.244 | 0.38  |
|              |         |               |              | Ex2+3C>T   | 5'UTR        | 5031052  | 0.017 | 0.015 |
| Ex2+4G>A     | 5'UTR   |               |              | 2273953    | 0.234        | 0.248    |       |       |
| Ex2+14C>T    | 5'UTR   |               |              | 1801173    | 0.189        | 0.226    |       |       |
| Ex5+90C>T    | T173T   |               |              | 1801174    | 0.143        | 0.14     |       |       |
| Ex14+252G>A  | A610A   |               |              | 9662633    | 0.054        | 0.044    |       |       |
| IVS1-9896T>A | Intron  |               |              | 3765701    | 0.47         | 0.44     |       |       |
| IVS1-7449G>C | Intron  |               |              | 12027041   | 0.35         | 0.419    |       |       |
| <b>TREX1</b> | 3p21.31 | *1454C>T      | 3' near gene | 1181869    | 0.31         | 0.29     |       |       |
|              |         | Ex2-9A>C      | K125Q        | 11925638   | 0.045        | 0.018    |       |       |
|              |         | Ex14-460C>T   | 3'UTR        | 11797      | 0.431        | 0.43     |       |       |
|              |         | Ex14+297A>G   | 3'UTR        | 12486046   | 0.05         | 0.065    |       |       |
|              |         | Ex14+782T>C   | 3'UTR        | 3135941    | 0.183        | 0.20     |       |       |

SNP, single-nucleotide polymorphism; RS#, reference SNP identification number; UTR, untranslated region.

<sup>1</sup>The reported minor allele frequency was from the NCBI dbSNP database.

## Supplemental Table 2. Linkage disequilibrium of the 102 SNPs

| <b>EXO1</b>   | T439M   | R354H   | P757L   | V458M   | Ex2+1G>A | Ex2+117C>T | N279S   | IVS10-2632G>T | E589K  | E670G   | Ex16-7A>G |
|---------------|---------|---------|---------|---------|----------|------------|---------|---------------|--------|---------|-----------|
| T439M         |         |         |         |         |          |            |         |               |        |         |           |
| R354H         | -0.967  |         |         |         |          |            |         |               |        |         |           |
| P757L         | 0.3406  | -0.7405 |         |         |          |            |         |               |        |         |           |
| V458M         | -0.8703 | -0.9687 | 0.0409  |         |          |            |         |               |        |         |           |
| Ex2+1G>A      | -0.8653 | 0.9407  | -0.5479 | -0.8032 |          |            |         |               |        |         |           |
| Ex2+117C>T    | -0.9117 | -0.9268 | 0.2339  | 0.8865  | -0.8207  |            |         |               |        |         |           |
| N279S         | -0.429  | -0.7413 | -0.0657 | -0.5211 | -0.3323  | 0.5713     |         |               |        |         |           |
| IVS10-2632G>T | -0.9174 | -0.9451 | 0.1997  | 0.9125  | -0.745   | 0.9105     | 0.3665  |               |        |         |           |
| E589K         | 0.5152  | 0.2612  | 0.146   | -0.6955 | 0.2336   | -0.5226    | -0.3676 | -0.4924       |        |         |           |
| E670G         | 0.0233  | 0.476   | -0.8924 | -0.4595 | 0.5083   | -0.6113    | -1      | -0.5647       | 0.1875 |         |           |
| Ex16-7A>G     | 0.2783  | -0.2208 | 0.9383  | -0.1682 | -0.175   | -0.0239    | -0.2968 | -0.0434       | 0.1495 | -0.5269 |           |

| <b>MGMT</b>   | IVS4-44836G>A | IVS4-75473G>A | IVS4-7901C>T | IVS5+23129G>A | Ex1-16C>T | I143V   | K178R   | L53L   | L84F |
|---------------|---------------|---------------|--------------|---------------|-----------|---------|---------|--------|------|
| IVS4-44836G>A |               |               |              |               |           |         |         |        |      |
| IVS4-75473G>A | 0.5119        |               |              |               |           |         |         |        |      |
| IVS4-7901C>T  | 0.0681        | 0.0351        |              |               |           |         |         |        |      |
| IVS5+23129G>A | 0.047         | -0.0332       | -0.0322      |               |           |         |         |        |      |
| Ex1-16C>T     | -0.0272       | 0.5668        | -0.2421      | 0.1138        |           |         |         |        |      |
| I143V         | 0.1061        | 0.0984        | 0.1324       | 0.4158        | -0.3543   |         |         |        |      |
| K178R         | 0.0609        | 0.0493        | 0.1488       | 0.3379        | -0.3397   | 0.9533  |         |        |      |
| L53L          | -0.0187       | 0.2122        | -0.3348      | -0.2646       | 0.1129    | -0.5581 | -0.3992 |        |      |
| L84F          | -0.0212       | 0.1391        | -0.1939      | -0.3271       | 0.1385    | -0.5782 | -0.4392 | 0.8709 |      |

| <b>MLH1</b>  | I219V  | V213M | IVS12-169C>T | -93G>A  | IVS3-659A>C | *919T>C | IVS14-19A>G |
|--------------|--------|-------|--------------|---------|-------------|---------|-------------|
| I219V        |        |       |              |         |             |         |             |
| V213M        | 1      |       |              |         |             |         |             |
| IVS12-169C>T | 1      | 1     |              |         |             |         |             |
| -93G>A       | -0.733 | 1     | -0.5904      |         |             |         |             |
| IVS3-659A>C  | 0.9125 | 1     | 0.9194       | -0.6002 |             |         |             |
| *919T>C      | 1      | 1     | 0.9149       | -0.6175 | 0.9312      |         |             |
| IVS14-19A>G  | 1      | 1     | 0.9057       | -0.5324 | 0.9167      | 0.8992  |             |

| <b>MLH3</b> | P844L   | Q1421Q  | D1105E | V741F   | IVS6+35C>G |
|-------------|---------|---------|--------|---------|------------|
| P844L       |         |         |        |         |            |
| Q1421Q      | 0.8525  |         |        |         |            |
| D1105E      | 0.3148  | 0.4378  |        |         |            |
| V741F       | -0.4776 | 0.5841  | -1     |         |            |
| IVS6+35C>G  | -0.8466 | -0.8753 | 0.2105 | -0.6078 |            |

| <b>MSH2</b> | G322D | IVS12-6T>C | IVS12-265A>G | IVS1+9C>G | IVS9-9A>T | IVS11-62G>A | -117T>C |
|-------------|-------|------------|--------------|-----------|-----------|-------------|---------|
| G322D       |       |            |              |           |           |             |         |

|              |          |         |         |          |         |       |  |  |  |  |
|--------------|----------|---------|---------|----------|---------|-------|--|--|--|--|
| IVS12-6T>C   | 0.5583   |         |         |          |         |       |  |  |  |  |
| IVS12-265A>G | 0.3609   | 0.8316  |         |          |         |       |  |  |  |  |
| IVS1+9C>G    | 0.2894   | 0.7123  | 0.5744  |          |         |       |  |  |  |  |
| IVS9-9A>T    | -0.3786  | -0.607  | 0.981   | 0.8582   |         |       |  |  |  |  |
| IVS11-62G>A  | 0.1097   | 0.0185  | -0.1108 | 6.21E-03 | -0.1585 |       |  |  |  |  |
| -117T>C      | 9.63E-03 | -0.4805 | 0.7447  | 0.7162   | 0.8418  | 0.021 |  |  |  |  |

|               |         |         |         |             |               |               |              |      |  |  |  |
|---------------|---------|---------|---------|-------------|---------------|---------------|--------------|------|--|--|--|
| <b>MSH3</b>   | P231P   | T1045A  | Q949R   | Ex24-318G>A | IVS10-3448A>G | IVS12+1841T>G | IVS23+437G>A | I79V |  |  |  |
| P231P         |         |         |         |             |               |               |              |      |  |  |  |
| T1045A        | -0.8356 |         |         |             |               |               |              |      |  |  |  |
| Q949R         | -0.3522 | 0.4857  |         |             |               |               |              |      |  |  |  |
| Ex24-318G>A   | 0.0302  | 0.1176  | 0.2869  |             |               |               |              |      |  |  |  |
| IVS10-3448A>G | 0.9354  | -0.7809 | -0.3486 | 0.0776      |               |               |              |      |  |  |  |
| IVS12+1841T>G | -1      | 0.0289  | -0.5173 | -0.3509     | -0.3923       |               |              |      |  |  |  |
| IVS23+437G>A  | -0.658  | 0.946   | 0.462   | 0.0423      | -0.7805       | 0.0609        |              |      |  |  |  |
| I79V          | -1      | 0.1431  | -0.6324 | -0.3007     | -0.8222       | 0.9404        | 0.188        |      |  |  |  |

|              |         |         |              |             |      |  |  |  |  |  |  |
|--------------|---------|---------|--------------|-------------|------|--|--|--|--|--|--|
| <b>MSH6</b>  | G39E    | D180D   | IVS1+2214C>T | IVS4-101G>C | P92P |  |  |  |  |  |  |
| G39E         |         |         |              |             |      |  |  |  |  |  |  |
| D180D        | -0.4892 |         |              |             |      |  |  |  |  |  |  |
| IVS1+2214C>T | -0.5007 | -1      |              |             |      |  |  |  |  |  |  |
| IVS4-101G>C  | -0.4247 | -0.8668 | -0.9249      |             |      |  |  |  |  |  |  |
| P92P         | -0.6123 | 0.907   | -1           | -0.9015     |      |  |  |  |  |  |  |

|              |         |         |          |              |         |         |             |             |         |         |         |          |
|--------------|---------|---------|----------|--------------|---------|---------|-------------|-------------|---------|---------|---------|----------|
| <b>PMS2</b>  | P470S   | K541E   | S260S    | IVS1-1121C>T | T597S   | M622I   | IVS7-164T>G | IVS7+442G>T | F751F   | N775S   | -153C>G | -3905C>T |
| P470S        |         |         |          |              |         |         |             |             |         |         |         |          |
| K541E        | -1      |         |          |              |         |         |             |             |         |         |         |          |
| S260S        | -0.9648 | 0.9412  |          |              |         |         |             |             |         |         |         |          |
| IVS1-1121C>T | -0.48   | -0.3671 | -0.1928  |              |         |         |             |             |         |         |         |          |
| T597S        | 0.3842  | -0.9998 | -0.7729  | -0.487       |         |         |             |             |         |         |         |          |
| M622I        | -0.6637 | -0.2    | -0.2433  | -0.3229      | 0.1136  |         |             |             |         |         |         |          |
| IVS7-164T>G  | 0.9466  | -0.9653 | -0.8913  | -0.3657      | 0.7859  | -0.6374 |             |             |         |         |         |          |
| IVS7+442G>T  | -1      | -0.7829 | -0.7368  | 0.2887       | -0.5113 | -0.5741 | -0.9752     |             |         |         |         |          |
| F751F        | -0.3809 | -0.4065 | 9.38E-03 | 0.1259       | -0.1185 | -0.1915 | -0.1071     | -0.1126     |         |         |         |          |
| N775S        | -0.5114 | -0.4704 | 0.0581   | 0.2074       | 0.0581  | 0.1256  | -0.1287     | -0.1339     | 0.839   |         |         |          |
| -153C>G      | -0.9522 | -0.8063 | -0.5948  | 0.6524       | -1      | -0.7731 | -0.9505     | 0.963       | -0.2498 | -0.3297 |         |          |
| -3905C>T     | -1      | -0.9256 | -0.7514  | 0.8166       | -1      | -0.9999 | -0.9606     | 0.9321      | -0.4164 | -0.3161 | 0.945   |          |

|               |           |           |              |            |             |           |  |  |  |  |  |
|---------------|-----------|-----------|--------------|------------|-------------|-----------|--|--|--|--|--|
| <b>PMS2L3</b> | Ex7-32G>A | IVS3+9A>G | IVS2-1578A>G | Ex1+118C>T | IVS1-338A>G | IVS1-8C>T |  |  |  |  |  |
| Ex7-32G>A     |           |           |              |            |             |           |  |  |  |  |  |
| IVS3+9A>G     | -0.8687   |           |              |            |             |           |  |  |  |  |  |
| IVS2-1578A>G  | -0.9999   | 0.0467    |              |            |             |           |  |  |  |  |  |
| Ex1+118C>T    | -1        | -0.0837   | 0.3179       |            |             |           |  |  |  |  |  |

|             |        |         |        |        |         |
|-------------|--------|---------|--------|--------|---------|
| IVS1-338A>G | 0.0117 | 0.1113  | -0.028 | 0.4519 |         |
| IVS1-8C>T   | -0.327 | -0.6139 | -1     | -1     | -0.9946 |

| RECQL        | Ex1+61A>C | N577N   | *1236A>G | IVS12-916T>C | IVS11+582T>A | IVS11+218T>G | IVS8+532A>G | IVS8+190A>G | IVS6-1031T>C | IVS6+1916T>G | IVS5-717C>A | IVS4-795C>T | IVS4+1179T>C | IVS2-172C>T | IVS2+703T>C | IVS1-92C>T | IVS1-570T>G | Ex1+123C>T | -5349A>G | IVS2+1222T>C | Ex15+159A>C |  |
|--------------|-----------|---------|----------|--------------|--------------|--------------|-------------|-------------|--------------|--------------|-------------|-------------|--------------|-------------|-------------|------------|-------------|------------|----------|--------------|-------------|--|
| Ex1+61A>C    |           |         |          |              |              |              |             |             |              |              |             |             |              |             |             |            |             |            |          |              |             |  |
| N577N        | -0.7128   |         |          |              |              |              |             |             |              |              |             |             |              |             |             |            |             |            |          |              |             |  |
| *1236A>G     | -0.8711   | -1      |          |              |              |              |             |             |              |              |             |             |              |             |             |            |             |            |          |              |             |  |
| IVS12-916T>C | -0.0498   | 0.6168  | -0.7532  |              |              |              |             |             |              |              |             |             |              |             |             |            |             |            |          |              |             |  |
| IVS11+582T>A | 0.4088    | 0.8021  | -0.831   | 0.5492       |              |              |             |             |              |              |             |             |              |             |             |            |             |            |          |              |             |  |
| IVS11+218T>G | -0.9092   | -1      | 0.8909   | -0.7672      | -0.8938      |              |             |             |              |              |             |             |              |             |             |            |             |            |          |              |             |  |
| IVS8+532A>G  | -0.7767   | -0.269  | -0.5965  | -0.1982      | 0.7973       | -0.8223      |             |             |              |              |             |             |              |             |             |            |             |            |          |              |             |  |
| IVS8+190A>G  | -0.8052   | -0.677  | -0.6042  | -0.4543      | 0.7696       | -0.854       | 0.8697      |             |              |              |             |             |              |             |             |            |             |            |          |              |             |  |
| IVS6-1031T>C | -0.6161   | 0.2925  | -0.6574  | 0.6074       | 0.5172       | -0.8284      | 0.8665      | 0.8288      |              |              |             |             |              |             |             |            |             |            |          |              |             |  |
| IVS6+1916T>G | 0.7879    | -1      | -0.7636  | -0.1003      | 0.4744       | -0.6149      | -0.4436     | -0.3705     | -0.5398      |              |             |             |              |             |             |            |             |            |          |              |             |  |
| IVS5-717C>A  | -0.8996   | -0.5408 | -0.553   | -0.482       | 0.9206       | -0.8052      | 0.886       | 0.9229      | 0.9402       | -0.6392      |             |             |              |             |             |            |             |            |          |              |             |  |
| IVS4-795C>T  | -0.9497   | -0.2356 | 0.6927   | -0.762       | -0.7729      | 0.7956       | -0.9337     | -0.8358     | -0.9395      | -0.771       | -1          |             |              |             |             |            |             |            |          |              |             |  |
| IVS4+1179T>C | -0.7322   | 0.3582  | -0.6596  | 0.6323       | 0.5729       | -0.881       | 0.8675      | 0.8109      | 0.9468       | -0.611       | 0.9559      | -0.9679     |              |             |             |            |             |            |          |              |             |  |
| IVS2-172C>T  | -0.7244   | 0.5003  | -0.6652  | 0.637        | 0.8678       | -0.8523      | -0.5111     | -0.7499     | 0.8457       | -0.6747      | -1          | -0.7857     | 0.8943       |             |             |            |             |            |          |              |             |  |
| IVS2+703T>C  | -0.9627   | -0.451  | -0.7805  | -0.2028      | 0.5142       | -0.8646      | 0.6915      | 0.6485      | 0.873        | -0.6282      | 0.8236      | -0.941      | 0.8893       | -0.654      |             |            |             |            |          |              |             |  |
| IVS1-92C>T   | -0.8939   | -0.4265 | -0.7502  | -0.4643      | 0.9031       | -0.8036      | 0.8889      | 0.9213      | 0.9662       | -0.7066      | 0.9441      | -0.9507     | 0.9598       | -1          | 0.9586      |            |             |            |          |              |             |  |
| IVS1-570T>G  | 0.808     | -0.5453 | -0.8054  | 0.0573       | 0.481        | -0.8409      | 0.5801      | 0.5141      | 0.443        | 0.5682       | 0.677       | -0.8432     | 0.4525       | -0.545      | 0.8332      | 0.8241     |             |            |          |              |             |  |
| Ex1+123C>T   | 0.9206    | -0.7366 | -0.8612  | -0.0151      | 0.1413       | -0.8938      | -0.6683     | -0.8536     | -0.0305      | 0.5985       | -0.8472     | -0.8937     | -0.033       | -0.5196     | 0.0799      | -0.934     | 0.8194      |            |          |              |             |  |
| -5349A>G     | -0.7643   | -0.5342 | -0.7246  | -0.3742      | 0.7129       | -0.7518      | 0.7009      | 0.6458      | 0.7888       | -0.278       | 0.7729      | -0.8623     | 0.7878       | -0.8917     | 0.8143      | 0.9277     | 0.7612      | -0.4391    |          |              |             |  |
| IVS2+1222T>C | -0.8886   | -0.4928 | -0.7788  | -0.1344      | 0.5049       | -0.8542      | 0.6587      | 0.653       | 0.8712       | -0.5857      | 0.7931      | -0.9603     | 0.8871       | -0.5857     | 0.9648      | 0.9278     | 0.8179      | 0.0662     | 0.7965   |              |             |  |
| Ex15+159A>C  | -0.7974   | -0.9668 | 0.9213   | -0.6627      | -0.7906      | 0.894        | -0.6714     | -0.6419     | -0.7131      | -0.5726      | -0.646      | 0.7599      | -0.752       | -0.7572     | -0.868      | -0.8264    | -0.7953     | -0.8203    | -0.7264  | -0.8588      |             |  |

| TP73         | Ex2+4G>A | Ex2+14C>T | Ex2+3C>T | T173T   | IVS1-9896T>A | IVS1-7449G>C | *1454C>T | A610A |
|--------------|----------|-----------|----------|---------|--------------|--------------|----------|-------|
| Ex2+4G>A     |          |           |          |         |              |              |          |       |
| Ex2+14C>T    | 0.9722   |           |          |         |              |              |          |       |
| Ex2+3C>T     | -0.9999  | -1        |          |         |              |              |          |       |
| T173T        | 0.1287   | 0.1       | 0.1129   |         |              |              |          |       |
| IVS1-9896T>A | 0.224    | 0.2243    | -0.2823  | -0.0153 |              |              |          |       |
| IVS1-7449G>C | 0.7805   | 0.8712    | -0.6974  | 0.0255  | 0.306        |              |          |       |
| *1454C>T     | 0.0351   | 0.0386    | 0.4003   | 0.8713  | -0.1157      | -0.0246      |          |       |
| A610A        | 0.0345   | 0.0506    | 0.1218   | -0.4003 | 0.123        | 0.0211       | 0.8604   |       |

| TREX1       | Ex14-460C>T | K125Q | Ex14+297A>G | Ex14+782T>C |
|-------------|-------------|-------|-------------|-------------|
| Ex14-460C>T |             |       |             |             |
| K125Q       | -0.2113     |       |             |             |
| Ex14+297A>G | 0.5371      | 0.067 |             |             |
| Ex14+782T>C | -0.8587     | -1    | -0.4613     |             |

0.5 ≤ |D| < 0.9  
0.9 ≤ |D| ≤ 1

**Supplemental Table 3. Association of haplotype with pancreatic cancer risk**

| Haplotype          | Frequency (Case/Control) | OR <sup>†</sup> (95% CI) | P <sup>†</sup> |
|--------------------|--------------------------|--------------------------|----------------|
| <i>EXO1</i>        |                          |                          |                |
| CACGCCAGGG         | 0.155/0.169              | 1.0                      |                |
| <b>CGCGTTATAG</b>  | 0.03/0.047               | 0.54 (0.32-0.91)         | 0.02           |
| <i>MGMT</i>        |                          |                          |                |
| GGCG               | 0.1268/0.1113            | 1.0                      |                |
| <b>AACG</b>        | 0.0903/0.094             | 0.63 (0.45-0.87)         | 0.005          |
| <b>GATG</b>        | 0.0451/0.0362            | 1.92 (1.17-3.15)         | 0.01           |
| <b>GACG</b>        | 0.0449/0.0456            | 0.50 (0.26-0.98)         | 0.04           |
| <b>AGTA</b>        | 0.0295/0.019             | 2.03 (1.03-4.02)         | 0.04           |
| <b>AGCG</b>        | 0.0293/0.0147            | 3.19 (1.20-8.48)         | 0.02           |
| <b>AGTG</b>        | 0.0276/0.01              | 5.35 (1.74-16.4)         | 0.003          |
| <i>MLH1</i>        |                          |                          |                |
| ATGCCG             | 0.2713/0.3266            | 1.0                      |                |
| <b>ACAATA</b>      | 0.2088/0.2041            | 1.26 (1.01-1.57)         | 0.04           |
| <b>ACGCCG</b>      | 0.0282/0.0141            | 1.87 (1.06-3.30)         | 0.03           |
| <b>ATGCCA</b>      | 0.0247/0.0119            | 1.93 (1.05-3.55)         | 0.03           |
| <b>ACGATG</b>      | 0.0229/0.0104            | 2.56 (1.34-4.88)         | 0.004          |
| <i>MSH2</i>        |                          |                          |                |
| GTACAGT            | 0.4153/0.3988            | 1.0                      |                |
| GTAGA <b>A</b> T   | 0.0974/0.1055            | 0.68 (0.50-0.91)         | 0.0098         |
| <i>MSH3</i>        |                          |                          |                |
| GAAGGTAA           | 0.1779/0.2152            | 1.0                      |                |
| GAA <b>A</b> GTAA  | 0.0196/0.0298            | 0.32 (0.14-0.72)         | 0.006          |
| <i>MSH6</i>        |                          |                          |                |
| GTCGA              | 0.1908/0.2241            | 1.0                      |                |
| <b>GCCGG</b>       | 0.1658/0.1643            | 1.36 (1.02-1.82)         | 0.03           |
| <b>GTTGA</b>       | 0.154/0.1433             | 1.48 (1.12-1.96)         | 0.006          |
| <b>GCCGA</b>       | 0.0894/0.0731            | 1.45 (1.10-1.91)         | 0.009          |
| <i>PMS2</i>        |                          |                          |                |
| TACCGGTA           | 0.1382/0.2323            | 1.0                      |                |
| <b>CACCGGTA</b>    | 0.0396/0.0243            | 1.83 (1.15-2.92)         | 0.01           |
| <b>CGGCTGCG</b>    | 0.022/0.0126             | 2.36 (1.06-5.25)         | 0.03           |
| <i>TP73</i>        |                          |                          |                |
| GCCCTGCG           | 0.2632/0.2626            | 1.0                      |                |
| GCCT <b>I</b> TGTG | 0.0344/0.0527            | 0.51 (0.33-0.80)         | 0.0029         |
| <b>ATCCTCTG</b>    | 0.0223/0.01              | 2.67 (1.27-5.63)         | 0.009          |
| <i>TREX1</i>       |                          |                          |                |
| TAAT               | 0.3764/0.3735            | 1.0                      |                |
| <b>CAGT</b>        | 0.025/0.0133             | 2.19 (1.07-4.48)         | 0.03           |

<sup>†</sup>Odds ratios and *P* values were from logistic regression adjusted for sex, race, age, diabetes, smoking, alcohol consumption, and family history of cancer.

Haplotypes with *P*>0.05 in logistic regression models are not shown.
